# Supplementary material for: Ultrasonic assisted extraction of artemisinin from Artemisia Annua L. using monoether-based solvents
Source: Royal Society of Chemistry journal article supplement (doi:10.1039/c7gc03191b), 2017-12-22
Supplement: c7gc03191b1.pdf [file c7gc03191b1.pdf]

## Electronic Supporting Information

### Ultrasonic Assisted Extraction of Artemisinin from *Artemisia Annua*

#### L. Using Monoether based Solvents

Yongqiang Zhang<sup>a,b</sup>, Phongphat Prawang<sup>a</sup>, Chunshan Li<sup>a,b</sup>, Xiangzhan Meng<sup>a</sup>, Yu Zhao<sup>c</sup>, Hui Wang<sup>a,\*</sup>, Suojiang Zhang<sup>a,\*</sup>

<sup>a</sup>Beijing Key Laboratory of Ionic Liquids Clean Process, Key Laboratory of Green Process Engineering, State Key Laboratory of Multiphase Complex Systems, Institute of Process Engineering, Chinese Academy of Sciences, Beijing, 100190 P.R. China.

<sup>b</sup>Sino-Danish College, University of Chinese Academy of Sciences, Beijing, 100049 P.R. China

<sup>c</sup>School of Chemical Engineering and Energy, Zhengzhou University, Zhengzhou, 450001 P.R. China

#### 1. UPLC-MS analysis of the extract obtained using PGME under ultrasonics

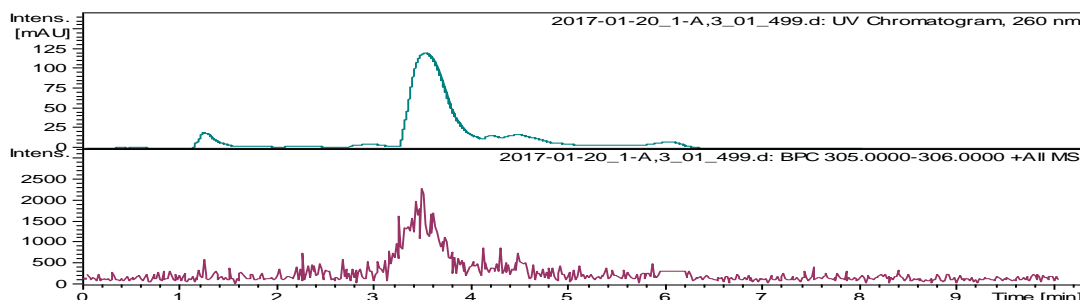

Figure S1a. UPLC chromatogram of the extract derivative.

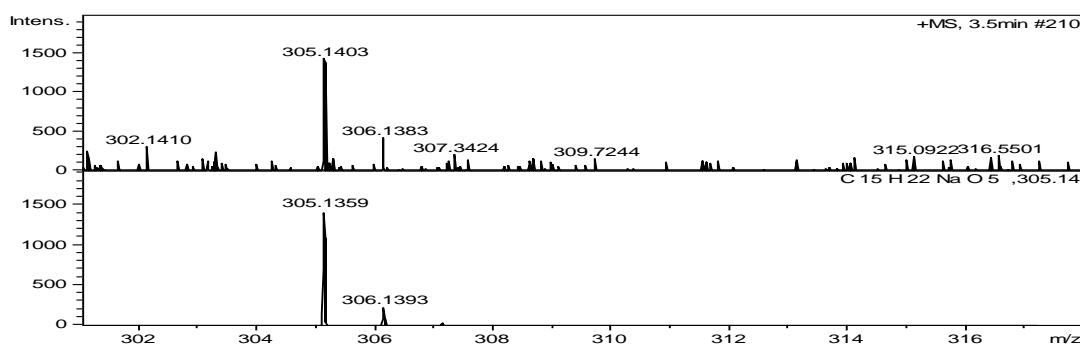

Figure S1b. ESI-MS spectra of the extract derivative.

| Meas. m/z | # | Formula                                            | Score  | m/z      | err [mDa] | err [ppm] | mSigma | rdb | e <sup>-</sup> | Conf | N-Rule |
|-----------|---|----------------------------------------------------|--------|----------|-----------|-----------|--------|-----|----------------|------|--------|
| 305.1403  | 1 | C <sub>15</sub> H <sub>22</sub> NaO <sub>5</sub>   | 100.00 | 305.1359 | -4.3      | -14.2     | 74.7   | 4.5 | even           |      | ok     |
|           | 2 | C <sub>15</sub> H <sub>18</sub> N <sub>6</sub> Na  | 0.03   | 305.1485 | 8.2       | 27.0      | 106.9  | 9.5 | even           |      | ok     |
|           | 3 | C <sub>15</sub> H <sub>30</sub> N <sub>4</sub> NaO | 0.00   | 305.2312 | 0.0       | 0.0       | 816.9  | 2.5 | even           |      | ok     |

Figure S1c. Molecular formula of the extract derivative on UPLC-MS (Q260: C<sub>15</sub>H<sub>22</sub>O<sub>5</sub>)

\* Corresponding authors: E-mail addresses: [huiwang@ipe.ac.cn](mailto:huiwang@ipe.ac.cn) (H. Wang),  
[sjzhang@ipe.ac.cn](mailto:sjzhang@ipe.ac.cn) (S. Zhang), Fax: 86 10 82627080

## 2. Calibration curve for quantitative determination

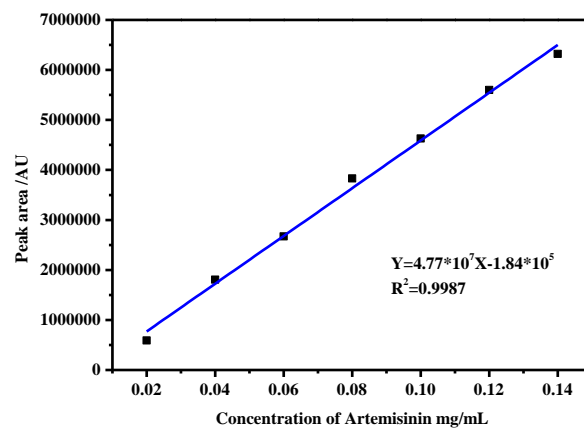

**Figure S2.** Calibration curve of artemisinin standard solutions.

### 3. Response surface methodology (RSM)

**Table S1.** Experimental design matrix to screen important variables for extraction efficiency of artemisinin.

| RSM | Ratio (mL/g) | Temperature (°C) | Time (min) | Ultrasonic Power (W) | Average extraction efficiency (%) |
|-----|--------------|------------------|------------|----------------------|-----------------------------------|
| 1   | 20           | 70               | 5          | 250                  | 79.91                             |
| 2   | 11           | 45               | 32.5       | 175                  | 86.14                             |
| 3   | 20           | 20               | 60         | 100                  | 89.92                             |
| 4   | 2            | 70               | 5          | 100                  | 39.73                             |
| 5   | 11           | 70               | 32.5       | 175                  | 86.06                             |
| 6   | 20           | 70               | 60         | 100                  | 93.92                             |
| 7   | 11           | 45               | 32.5       | 250                  | 75.46                             |
| 8   | 2            | 70               | 60         | 250                  | 51.00                             |
| 9   | 2            | 20               | 5          | 100                  | 36.17                             |
| 10  | 11           | 45               | 32.5       | 175                  | 86.14                             |
| 11  | 20           | 20               | 60         | 250                  | 97.18                             |
| 12  | 11           | 20               | 32.5       | 175                  | 80.28                             |
| 13  | 20           | 45               | 32.5       | 175                  | 100.00                            |
| 14  | 11           | 45               | 32.5       | 175                  | 86.43                             |
| 15  | 20           | 20               | 5          | 100                  | 74.28                             |
| 16  | 20           | 70               | 60         | 250                  | 99.85                             |
| 17  | 2            | 20               | 60         | 100                  | 43.96                             |
| 18  | 11           | 45               | 60         | 175                  | 80.58                             |
| 19  | 20           | 70               | 5          | 100                  | 78.87                             |
| 20  | 11           | 45               | 32.5       | 175                  | 86.06                             |
| 21  | 2            | 20               | 60         | 250                  | 50.56                             |
| 22  | 11           | 45               | 32.5       | 100                  | 67.68                             |
| 23  | 2            | 45               | 32.5       | 175                  | 59.01                             |
| 24  | 11           | 45               | 5          | 175                  | 60.93                             |
| 25  | 2            | 20               | 5          | 250                  | 43.51                             |
| 26  | 11           | 45               | 32.5       | 175                  | 86.21                             |
| 27  | 2            | 70               | 5          | 250                  | 50.70                             |
| 28  | 20           | 20               | 5          | 250                  | 83.17                             |
| 29  | 2            | 70               | 60         | 100                  | 44.40                             |
| 30  | 11           | 45               | 32.5       | 175                  | 86.36                             |

#### 4. Thermal stability of artemisinin

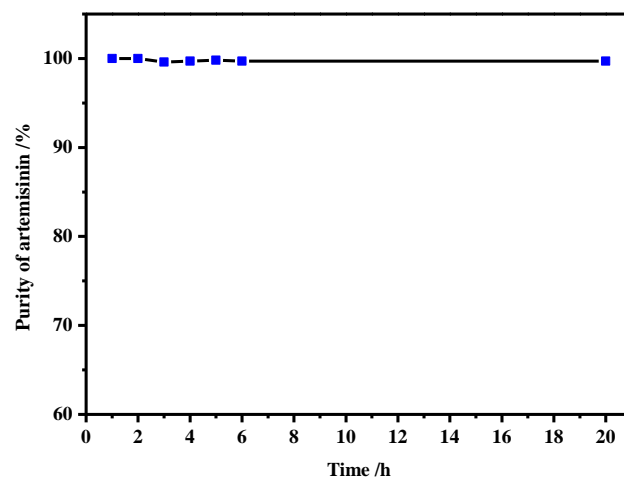

Figure S3. Thermal stability of artemisinin under 60 °C.

## 5. Repeatability study

**Table S2.** Repeatability of artemisinin extraction under optimized conditions.

| Entry | Extraction amount of artemisinin (mg) | Average (mg) | RSD (%) (n=5) |
|-------|---------------------------------------|--------------|---------------|
| 1     | 13.66                                 |              |               |
| 2     | 12.91                                 |              |               |
| 3     | 13.60                                 | 13.63        | 3.26          |
| 4     | 13.92                                 |              |               |
| 5     | 14.06                                 |              |               |

## 6. Energy consumption (PGME with UAE vs. Soxhlet extraction)

Based on the power of the instrument we used, the energy needed for each process was calculated under optimized conditions: 60 °C, 8 h for Soxhlet extraction and 38 °C, 180 W, 0.5 h for ultrasonic method (as mentioned in the RSM discussion section). Full power of IKA RCT heater was 650 W. Usually, it took 0.5 h for the temperature to increase from room temperature to 60 °C and 1/3 of the full power was needed to keep at such a temperature. Thus, the energy consumption of Soxhlet extraction was:

$$E_{\text{Soxhlet}} = P_{\text{heater}} \times t_1 + 1/3 \times P_{\text{heater}} \times t_2 = 0.65 \times 0.5 + 0.65 \times 1/3 \times 8 = 2.06 \text{ kW h.}$$

$E_{\text{Soxhlet}}$ : energy consumption of Soxhlet extraction (kW h)

$P_{\text{heater}}$ : full power of IKA RCT heater (650 W)

$t_1$ : time for heating water bath from room temperature to 60 °C (h)

$t_2$ : time for keeping the temperature at 60 °C (h)

Ultrasonic process: The heater was needed to heat the water bath to the specified temperature, and it took around 0.25 h for the temperature to increase to 38 °C and 1/6 of the full power was needed for keeping at such a temperature. The energy consumption of ultrasonic assisted extraction was:

$$E_{\text{US}} = P_{\text{heater}} \times t_1' + 1/6 \times P_{\text{heater}} \times t_2' + P_{\text{US}} \times t' = \\ 0.65 \times 0.25 + 0.65 \times 1/6 \times (0.5 - 0.25) + 0.18 \times 0.5 = 0.28 \text{ kW h}$$

$E_{\text{US}}$ : energy consumption of ultrasonic assisted extraction (kW h)

$P_{\text{US}}$ : optimized power of ultrasonic (180 W)

$t'$ : ultrasonic time for artemisinin extraction (h)

$t_1'$ : time for heating water bath from room temperature to 38 °C (h)

$t_2'$ : time for keeping the temperature at 38 °C (h)

## 7. Kinetic study

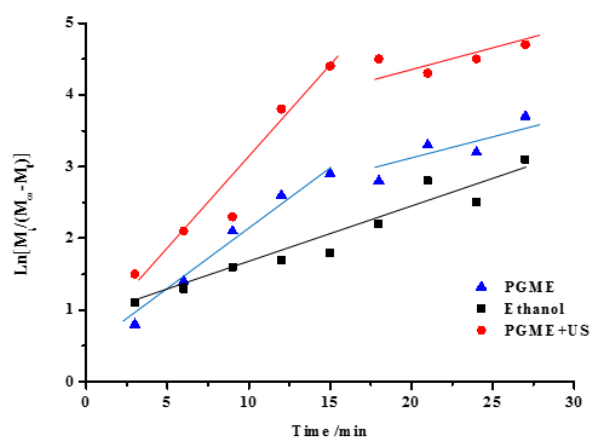

**Figure S4.** Kinetic study of artemisinin extractions: ■ Ethanol under heat-stirring, ● PGME under ultrasonic conditions, ▲ PGME under heat-stirring.

## 8. $^1\text{H}$ NMR

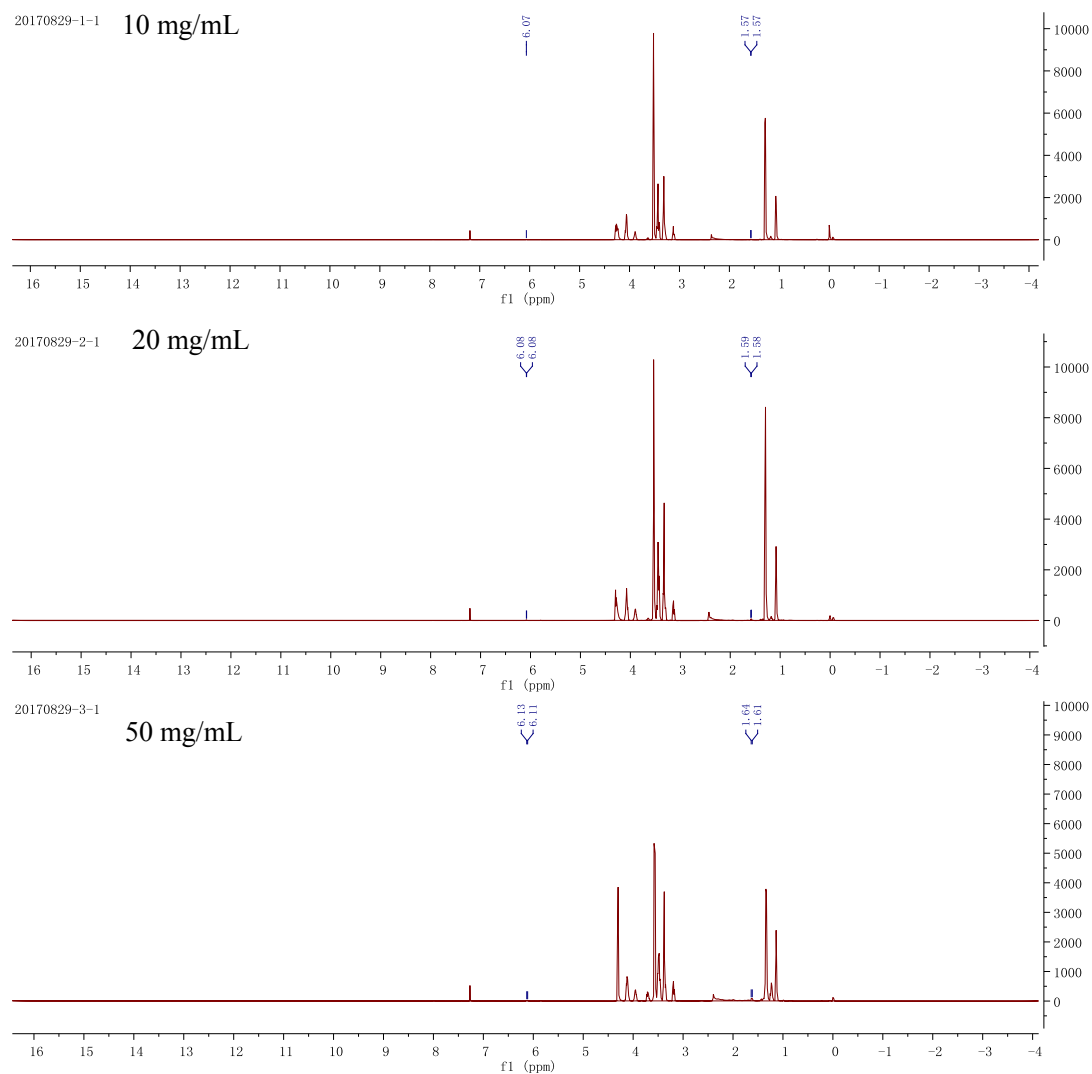

**Figure S5.**  $^1\text{H}$  NMR spectra of artemisinin/PGME solutions with different concentrations using  $\text{CDCl}_3$  as the external lock.
